# Supplementary material
Source: PubMed Central journal article supplement (PMC4920138)

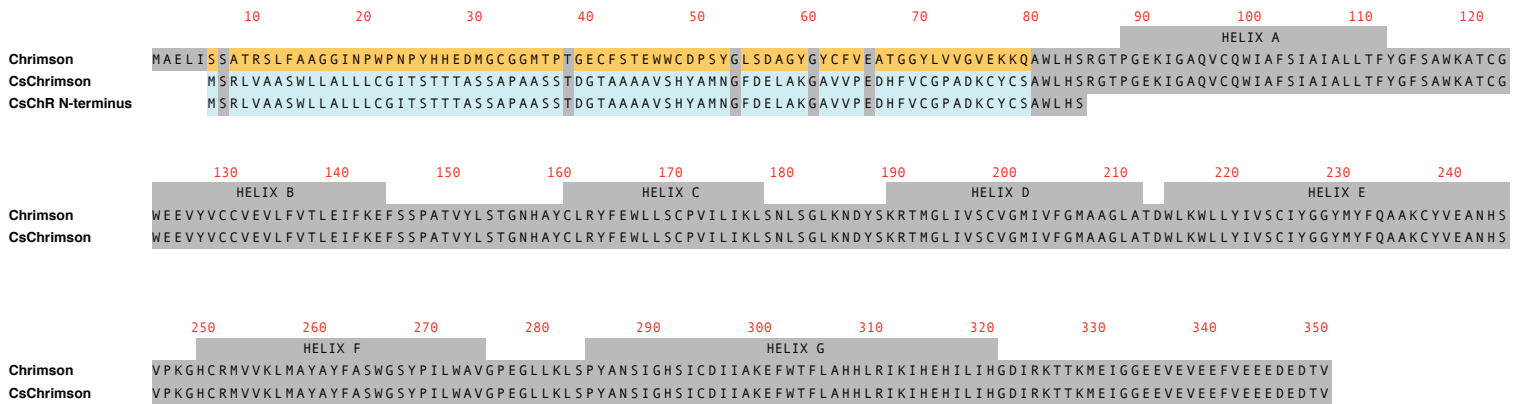

Supplement: NIHMS795179-supplement-Figure_1.pdf [file NIHMS795179-supplement-Figure_1.pdf]

Chrimson-GFP

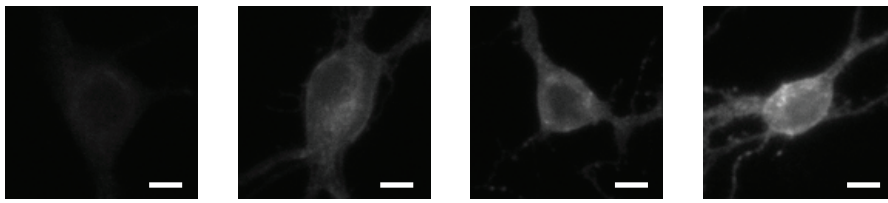

CsChrimson-GFP

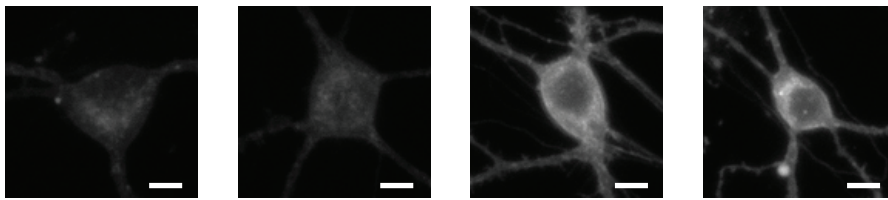

CsChrimson-KGC-GFP

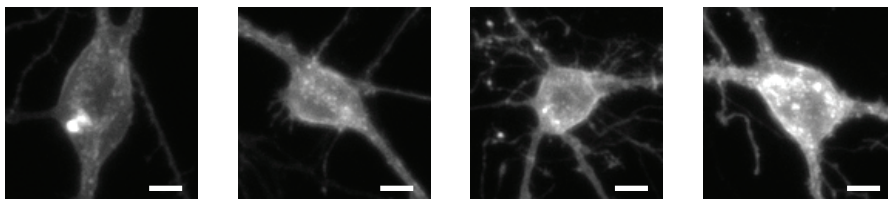

CsChrimson-GFP-ER2

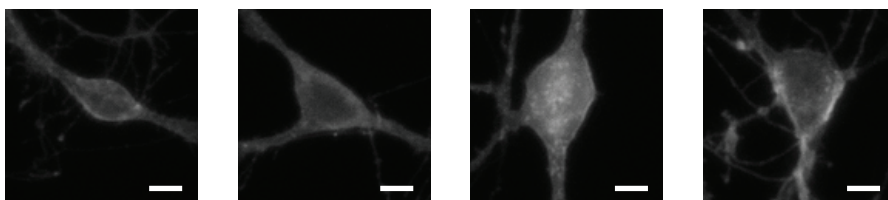

CsChrimson-KGC-GFP-ER2

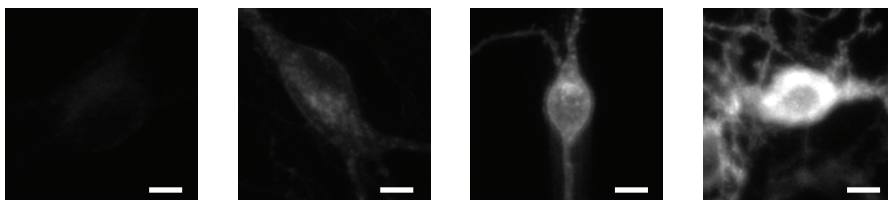

Supplement: NIHMS795179-supplement-Figure_2.pdf [file NIHMS795179-supplement-Figure_2.pdf]
